# Supplementary material for: Innovative on-site colorimetric assay of tetracyclines by smartphones in waters and milks based on a synergistic co-catalyst FeMoO4@Fe7S8 with strong interactions and complexation
Source: Royal Society of Chemistry journal article supplement (doi:10.1039/d4en00587b), 2024-01-01
Supplement: d4en00587b1.pdf [file d4en00587b1.pdf]

**A synergistic co-catalyst FeMoO<sub>4</sub>@Fe<sub>7</sub>S<sub>8</sub> based on strong interactions/complexation between Fe-Mo and C<sub>n</sub>-N(O) for smartphone-based visually colorimetric assay of tetracyclines**

Jingjing Gu<sup>1,2</sup>, Hailong Gong<sup>1</sup>, Yuhao Li<sup>1</sup>, Qinqin Ma<sup>1</sup>, Xiaofeng Hou<sup>1</sup>, Siyu Shen<sup>1</sup>, Tingting Liu<sup>1,3\*</sup>,  
Xuedong Wang<sup>2\*</sup>

<sup>1</sup>School of Environmental Science and Engineering, Suzhou University of Science and Technology, Suzhou, 215009, China

<sup>2</sup>College of Public Health and Management, Wenzhou Medical University, Wenzhou 325035, China

<sup>3</sup>Jiangsu Key Laboratory of Environmental Science and Engineering, Suzhou University of Science and Technology, Suzhou 215009, China

\* Corresponding author: Tingting Liu, Email: liutt@mail.usts.edu.cn; Xuedong Wang, Email: zjuwxd@163.com

Tel: 86-512-68095950; Fax: 86-512-68095950

---

## Main contents

**Text S1.** Synthesis of FeMoO<sub>4</sub> nanoparticles, Fe<sub>7</sub>S<sub>8</sub> nanosheets, and FeMoO<sub>4</sub>@Fe<sub>7</sub>S<sub>8</sub>-X NPs.

**Text S2.** Materials and reagents

**Text S3.** Instruments

**Text 4.** Optimization of the experimental conditions

**Text S5.** The peroxidase-like (POD) activity of FeMoO<sub>4</sub>@Fe<sub>7</sub>S<sub>8</sub>-1 NPs

**Text S6.** Steady-state kinetics of the FeMoO<sub>4</sub>@Fe<sub>7</sub>S<sub>8</sub>-1 NPs

**Text S7.** Colorimetric assay of TCs with FeMoO<sub>4</sub>@Fe<sub>7</sub>S<sub>8</sub>-1 NPs

**Text S8.** Pretreatment procedures for the real-world water and milk samples

**Text S9.** The detailed measurement of smartphone-based sensing analysis

**Text S10.** HPLC-DAD detection for OTC

**Fig. S1.** UV-Vis spectra in the FeMoO<sub>4</sub>@Fe<sub>7</sub>S<sub>8</sub>-X NPs (1, 2, 3, 4) +TMB+H<sub>2</sub>O<sub>2</sub> systems.

**Fig. S2.** (A-B) Linear plots of OTC in the range of 0.1-90 μM. The error bars represent the standard deviation ( $n=3$ ).

**Fig. S3.** (A) SEM image of FeMoO<sub>4</sub>@Fe<sub>7</sub>S<sub>8</sub>-1 NPs; (B) SEM image of FeMoO<sub>4</sub>@Fe<sub>7</sub>S<sub>8</sub>-1 NPs after 7 months of storage.

**Fig. S4.** Schematic illustration on the smartphone-based colorimetric assay platform.

**Fig. S5.** Linear relationship between peak area and concentration of OTC (0.1-20 μM)

**Table S1.** BET testing data.

**Table S2.** Comparison of the kinetics parameters of FeMoO<sub>4</sub>@Fe<sub>7</sub>S<sub>8</sub>-1 NPs with other TMCs-based nanozymes

---

**Text S1. Synthesis of  $\text{FeMoO}_4$  nanoparticles,  $\text{Fe}_7\text{S}_8$  nanosheet, and  $\text{FeMoO}_4@/\text{Fe}_7\text{S}_8\text{-X}$  NPs**

1.1. Synthesis of  $\text{FeMoO}_4$  nanoparticles

Firstly, 3 mM of  $\text{NaMoO}_4 \cdot 2\text{H}_2\text{O}$  was dissolved in 30 mL ultra-pure water for sample A. Similarly, 5 mM  $\text{FeCl}_3 \cdot 6\text{H}_2\text{O}$  and 10 mM NaAc were added to 30 mL ultra-pure water, which was marked as sample B. Then, the solution A and B were mixed for stirring 1 h and moved to autoclave. The ensuing reaction occurs at 200 °C for 24 h. The as-obtained  $\text{FeMoO}_4$  nanoparticles ( $\text{FeMoO}_4$  NPs) were washed three times with ultra-pure water and ET and finally dried in a vacuum drying oven at 60 °C for 4 h.

1.2. Synthesis of  $\text{Fe}_7\text{S}_8$  nanosheets

2.73 mM  $\text{FeCl}_2 \cdot 4\text{H}_2\text{O}$  and 3.6 mM TH were dissolved to 100 mL EG and stirred into the well-distributed solution. Then, the resulting mixture was put into the autoclave and heated to 200 °C for 12 h. The step of washing and drying method was the same as above, and the as-obtained  $\text{Fe}_7\text{S}_8$  nanosheets.

1.3 Synthesis of  $\text{FeMoO}_4@/\text{Fe}_7\text{S}_8\text{-X}$  NPs

The  $\text{FeCl}_3 \cdot 6\text{H}_2\text{O}$ ,  $\text{Na}_2\text{MoO}_4 \cdot 2\text{H}_2\text{O}$ , and TH were used as Fe, Mo and S sources, respectively, to prepare three aforementioned nanomaterials. The  $\text{FeMoO}_4@/\text{Fe}_7\text{S}_8\text{-X}$  NPs were successfully fabricated by a facile hydrothermal approach. Briefly, 3 mM  $\text{Na}_2\text{MoO}_4 \cdot 2\text{H}_2\text{O}$ , 4 mM OA, and 15 mM TH were dissolved in 40 mL ultra-pure water, which is denoted as sample A. Meanwhile, 5 mM  $\text{FeCl}_3 \cdot 6\text{H}_2\text{O}$  and 10 mM NaAc were added to 20 mL EG, stirring to form an orange-red mixture solution (sample B). Next, the as-prepared sample B was mixed with sample A and stirred for ~1 h. The mixed solution was poured into an autoclave at 200 °C for 24 h. The as-obtained  $\text{FeMoO}_4@/\text{Fe}_7\text{S}_8\text{-1}$  NPs were collected by centrifugation, washing three times with ultra-pure water and ET, respectively, and dried at 60 °C for 4 h in a vacuum oven. Besides, other three kinds of nanomaterials were prepared with different ratios of Fe and NaAc at 1:4, 1:5 and 1:6 by the above-mentioned method.

**Text S2. Materials and reagents**

A series of analytical or chromatographic-grade chemicals and reagents were purchased and used in the following experiments. NaAc (99.0%) and *p*-benzoquinone (PBQ, 99.2%) were acquired from Aladdin. Hydrogen peroxide ( $\text{H}_2\text{O}_2$ , 30.0 %), hydrated copper sulfate ( $\text{CuSO}_4 \cdot 5\text{H}_2\text{O}$ , 99.0%), aluminum nitrate nonahydrate ( $\text{Al}(\text{NO}_3)_3 \cdot 9\text{H}_2\text{O}$ , 99.0%), zinc sulfate heptahydrate ( $\text{ZnSO}_4 \cdot 7\text{H}_2\text{O}$ ,

---

99.0%), cobalt (II) nitrate hexahydrate ( $\text{Co}(\text{NO}_3)_2 \cdot 6\text{H}_2\text{O}$ , 99.0 %), silver nitrate ( $\text{AgNO}_3$ , 99.8%) were obtained from Adams. The following reagents were procured from Tansoole, including acetic acid glacial (HAc, 99.5%), dimethyl sulfoxide (DMSO, 99.5%), ethylene glycol (EG, 99.5%), ethanol (ET 99.0%), iron(III) chloride hexahydrate ( $\text{FeCl}_3 \cdot 6\text{H}_2\text{O}$ , 99.0%), sodium molybdate dihydrate ( $\text{Na}_2\text{MoO}_4 \cdot 2\text{H}_2\text{O}$ , 99.0%), thiourea (TH, 99.0%), 3,3',5,5'-tetramethylbenzidine (TMB, 99.0%), *o*-phenyl-enediamine (OPD, 99.0%), 2,2'-azino-bis(3-ethylbenzothiazoline-6-sulfonic acid) (ABTS, 97.0%), 3,3'-diaminobenzidine tetrahydrochloride (DAB, 98.0%), dihydroethidium (HE, 98.0%), terephthalic acid (TA, 98.0%), ethylenediaminetetraacetic acid (EDTA, 99.0%), citric acid (CA, 98.0%), nitrilotriacetic acid (NTA, 99.0%), oxalic acid (OA, 99.0%), tetracycline (TC, 98.0%), oxytetracycline (OTC, 98.0%), doxycycline hydrochloride (DOX, 98.0%), chlortetracycline (CTE, 98.0%), midecamycin (MID, 98.0%), erythromycin (ERY, 98.0%), sulfathiazole (STZ, 98.0%), sulfamethoxazole (SMZ, 98.0%), sulfamethoxazole (SDM, 98.0%), and cefotaxime (CTX, 98.0%). The standard solutions of  $\text{Ni}^{2+}$ ,  $\text{Hg}^{2+}$ ,  $\text{Pb}^{2+}$ ,  $\text{Se}^{4+}$ ,  $\text{As}^{3+}$ ,  $\text{NO}_2^-$ , and  $\text{PO}_4^{2-}$  were provided by the China Institute of Metrology (Beijing, China). Iron chloride tetrahydrate ( $\text{FeCl}_2 \cdot 4\text{H}_2\text{O}$ , 98.0%), 5,5-dimethyl-1-pyrroline N-oxide (DMPO, 97.0%), sodium oxalate (Ox, 99.5%), and 2',7'-dichlorodihydrofluorescein (DCFH, 98.0%) were supplied by Macklin. All reagents were used directly without further purification, and ultra-pure water ( $>18.2 \text{ M}\Omega$ ) was fabricated from a Milli-Q membrane-purification system (Bedford, MA, USA). All milk samples were purchased from local supermarkets in Suzhou.

### ***Text S3. Instruments***

The following instruments were used to obtain the spectral information of as-prepared nanomaterials and analyze the concentrations of TCs: LC-20AT Shimadzu HPLC equipped with a diode-array detector (HPLC-DAD, Tokyo, Japan) and FS-5 fluorescence spectrometer (Edinburgh, UK). Several equipments were employed to characterize the morphologies and physicochemical properties of  $\text{FeMoO}_4$  nanoparticles and  $\text{Fe}_7\text{S}_8$  nanosheets, and  $\text{FeMoO}_4@ \text{Fe}_7\text{S}_8$ -X NPs: scanning electron microscope (SEM, Quanta FEG 250, USA), high-resolution transmission electron microscope (HRTEM, FEI Tecnai F20, USA), X-ray diffractometer (XRD, Bruker D8 advance, Germany), UV-Vis spectrophotometer (UV-Vis, UV-5500PC, China), automatic surface area and porosity analyzer (TriStar II Plus 3030, USA), hysteresis loop test (VSM, LakeShore7404, USA), X-ray photoelectron spectrometer (XPS, Thermo Scientific ESCALAB 250Xi, USA), electron

---

paramagnetic resonance spectrometer (EPR, Bruker EMXplus-6, Germany), and Fourier transform infrared spectrometer (FTIR, Nicolet iS50, USA)

***Text S4. Optimization of the experimental conditions***

Some important reaction parameters were optimized to investigate their influences on the catalytic performance of FeMoO<sub>4</sub>@Fe<sub>7</sub>S<sub>8</sub>-1 NPs. These parameters included buffer type (HAc-NaAc, Tris-HCl, and PBS), buffer pH (3.2-6.0), incubation temperature (20-55 °C), incubation time (0-35 min), FeMoO<sub>4</sub>@Fe<sub>7</sub>S<sub>8</sub>-1 NPs concentration (5-50 µg mL<sup>-1</sup>), different chromogenic substrates (ABTS, DAB, TMB, OPD, and Strach-Nal), and type of FeMoO<sub>4</sub>@Fe<sub>7</sub>S<sub>8</sub>-X NPs (FeMoO<sub>4</sub>@Fe<sub>7</sub>S<sub>8</sub>-1 NPs, FeMoO<sub>4</sub>@Fe<sub>7</sub>S<sub>8</sub>-2 NPs, FeMoO<sub>4</sub>@Fe<sub>7</sub>S<sub>8</sub>-3 NPs, and FeMoO<sub>4</sub>@Fe<sub>7</sub>S<sub>8</sub>-4 NPs). A total of 75 µL FeMoO<sub>4</sub>@Fe<sub>7</sub>S<sub>8</sub>-X NPs (20 µg mL<sup>-1</sup>), 100 µL of TMB (6 mM), 75 µL of H<sub>2</sub>O<sub>2</sub> (50 mM) were introduced into 1650 µL of HAc-NaAc buffer (0.2 M, pH 3.6). Using external magnets to separate the FeMoO<sub>4</sub>@Fe<sub>7</sub>S<sub>8</sub>-1 NPs. The absorbance value at 654 nm (A<sub>654</sub>) was measured after incubation.

***Text S5. The peroxidase-like (POD) activity of FeMoO<sub>4</sub>@Fe<sub>7</sub>S<sub>8</sub>-1 NPs***

The POD activity of FeMoO<sub>4</sub>@Fe<sub>7</sub>S<sub>8</sub>-1 NPs was examined by means of a series of colorimetric assay in the presence of H<sub>2</sub>O<sub>2</sub> and TMB. The experiments were carried out in five systems: FeMoO<sub>4</sub>@Fe<sub>7</sub>S<sub>8</sub>-1 NPs+TMB+H<sub>2</sub>O<sub>2</sub>, TMB+H<sub>2</sub>O<sub>2</sub>, FeMoO<sub>4</sub>@Fe<sub>7</sub>S<sub>8</sub>-1 NPs+TMB, FeMoO<sub>4</sub>@Fe<sub>7</sub>S<sub>8</sub>-1 NPs+H<sub>2</sub>O<sub>2</sub>, and TMB. The FeMoO<sub>4</sub>@Fe<sub>7</sub>S<sub>8</sub>-1 NPs (75 µL, 20 µg mL<sup>-1</sup>), TMB (100 µL, 6mM), and H<sub>2</sub>O<sub>2</sub> (75 µL, 50 mM) were added to HAc-NaAc buffer (1650 µL, 0.2 M, pH=3.6) and then incubated at 40 °C for 20 min. Using external magnets to separate the FeMoO<sub>4</sub>@Fe<sub>7</sub>S<sub>8</sub>-1 NPs. Then, the solution was detected in the wavelength range of 400-750 nm by a UV-Vis spectrophotometer. Also, the POD activity was verified by the characteristic color of other chromogenic substrates, such as ABTS, DAB, and OPD.

The cyclic voltammetry (CV) and electrochemical impedance spectroscopy (EIS) tests were performed using a Chenhua CHI660D workstation with FeMoO<sub>4</sub>@Fe<sub>7</sub>S<sub>8</sub>-1 NPs, FeMoO<sub>4</sub> nanoparticles or Fe<sub>7</sub>S<sub>8</sub> nanosheets as the working electrode, saturated KCl solution as the counter electrode, and Ag/AgCl as the reference electrode, respectively.

***Text S6. Steady-state kinetics of the FeMoO<sub>4</sub>@Fe<sub>7</sub>S<sub>8</sub>-1 NPs***

To systematically evaluate the POD activity of FeMoO<sub>4</sub>@Fe<sub>7</sub>S<sub>8</sub>-1 NPs, the steady-state kinetics of this nanocomposite was probed under the following conditions: incubation temperature, 40 °C; a constant H<sub>2</sub>O<sub>2</sub> concentration, 2 mM; and varying TMB concentrations (0.2-6.0 mM) in the mixed

---

system of HAc-NaAc+FeMoO<sub>4</sub>@Fe<sub>7</sub>S<sub>8</sub>-1 NPs. Also, the catalytic kinetics was also investigated at a constant TMB concentration (6 mM) and varying H<sub>2</sub>O<sub>2</sub> concentrations (0.2-6.0 mM), while remaining other same reaction conditions. Subsequently, the kinetics parameters of the POD activity were computed on the basis of Michaelis-Menten equation:

$$v_0 = \frac{V_{max} [S]}{K_m + [S]}$$

where  $v_0$  is the initial reaction rate,  $V_{max}$  is the maximum reaction rate,  $K_m$  is the Michaelis-Menten constant (the substrate concentration at half the maximum reaction rate), and  $[S]$  is the TMB concentration.

***Text S7. Selectivity, anti-interference and stability of the colorimetric sensor***

To investigate the selectivity of the above standard mixed system towards TCs, a wide range of interfering substances were fortified, including cations (Ag<sup>+</sup>, Pb<sup>2+</sup>, Al<sup>3+</sup>, As<sup>3+</sup>, Co<sup>2+</sup>, Se<sup>4+</sup>, Mg<sup>2+</sup>, K<sup>+</sup>, Zn<sup>2+</sup>, Ni<sup>2+</sup>, Hg<sup>2+</sup>, Cu<sup>2+</sup>, Mn<sup>2+</sup>, Na<sup>+</sup>, and Ca<sup>2+</sup>), anions (NO<sub>2</sub><sup>-</sup>, PO<sub>4</sub><sup>2-</sup>, and Cl<sup>-</sup>), biological micromolecules (L-Threonine, L-Alanine, L-Serine, L-Histidine, L-Leucine, L-Tryptophan, D-Methionine, L-Glutamicacid, L-Malicacid, Glu, Cys, AA, and UA) and other antibiotics (MID, ERY, STZ, SMZ, SDM, and CTX). The concentrations of TCs, including TC, OTC, DOX, and CTC, were all set at 20 μM. In contrast, the concentrations of other interfering substances were all at 200 μM, i.e., 10-fold as high as those of TCs.

To ensure the stability of as-constructed colorimetric sensor for TCs, the post-reaction FeMoO<sub>4</sub>@Fe<sub>7</sub>S<sub>8</sub>-1 NPs were collected by centrifugation. The above experimental procedures were repeated after washing and drying, and the corresponding A<sub>654</sub> value was measured to evaluate changes in absorbance intensity during recycling use.

***Text S8. Pretreatment procedures for the real-world water and milk samples***

To evaluate the feasibility of the FeMoO<sub>4</sub>@Fe<sub>7</sub>S<sub>8</sub>-1 NPs based colorimetric assay, the 4 of real-world water and 11 of milk samples were collected and used for detecting OTC, including aquaculture waters from fish-shrimp-crab mixed pond, fish pond, shrimp pond, and crab pond, as well as various milk, including pure milk (whole milk, low-fat milk, and defatted milk), fresh milk (whole milk, low-fat milk, and defatted milk), buffalo milk and goat milk. Prior to analysis, water samples were filtered using 0.22-μm cellulose filter membranes. By way of contrast, acetonitrile (2 mL) was added to 1 mL of milk sample for the purpose of removing proteins. After filtration and

---

centrifugation, the supernatant was collected, and the subsequent procedures were similar as described above.

***Text S9. The detailed measurement of smartphone-based sensing analysis***

Different concentration of OTC standard solutions (0, 1, 4, 7, 10, 13, 16, 19, 20  $\mu\text{M}$ ) were added into the “ $\text{FeMoO}_4@\text{Fe}_7\text{S}_8$ -1 NPs+TMB+ $\text{H}_2\text{O}_2$ ” system, and incubated for 20 min at 40 °C. Firstly, the reaction solutions were sequentially transferred to 96-well plates, and placed into our auxiliary imaging interferogram device to capture images of the color changes by using a smartphone immediately. Then, the captured image was imported to “Thing identity” APP for established the standard curve of OTC. The method for detecting actual samples was operated as described above. According to the established standard curve, the relevant image of actual sample was used to analyze the concentration based on our APP (the detailed operations was seen in Fig. S3).

***Text S10. HPLC-DAD detection for OTC***

The concentration of OTC was determined by HPLC-DAD analysis in real-world water and milk samples. The HPLC-DAD instrument (Shimadzu HPLC, LC-20AT, Japan) was equipped with an Venusil XBP  $\text{C}_{18}$  column (4.6 $\times$ 250 mm, 5  $\mu\text{m}$ ) and a diode-array detector operated at a wavelength of 355 nm. The mobile phase consisted of 0.1% formic acid and acetonitrile (v:v=80%:20%) at a flow rate of 1.0 mL/min. The sample injection volume was 10  $\mu\text{L}$ . The linear relationship between peak area and concentration of OTC is presented in Fig. S4.

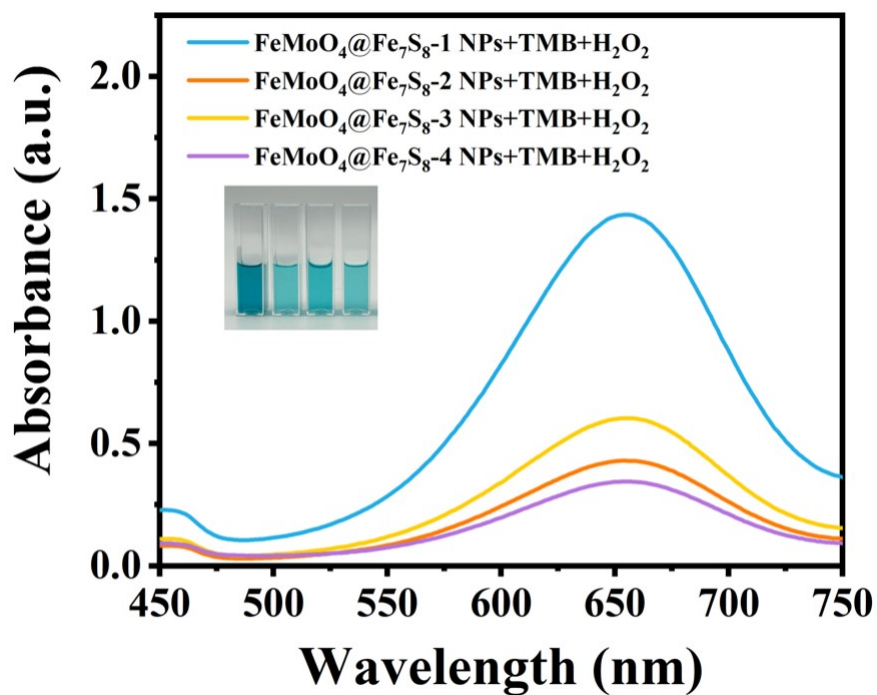

**Fig. S1.** UV-Vis spectra in the FeMoO<sub>4</sub>@Fe<sub>7</sub>S<sub>8</sub>-X NPs (1, 2, 3, 4) +TMB+H<sub>2</sub>O<sub>2</sub> systems.

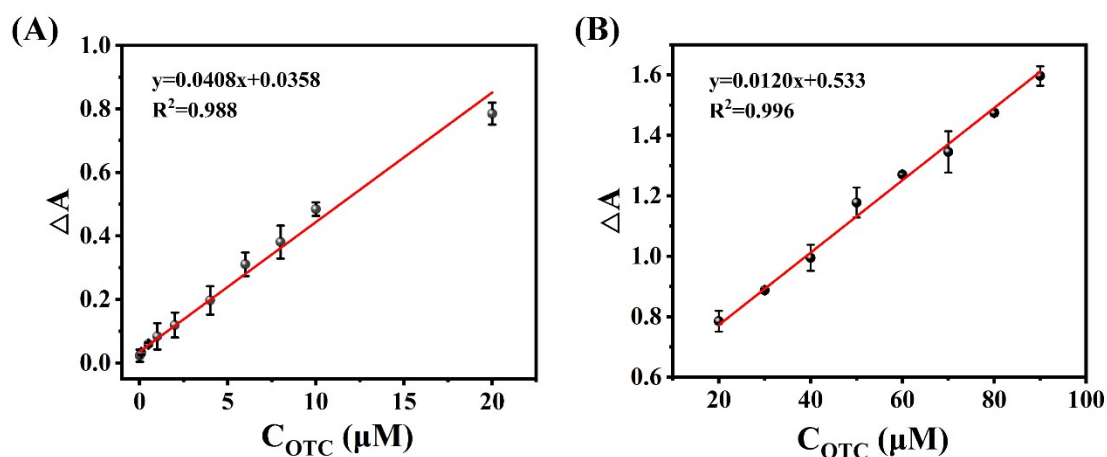

**Fig. S2.** (A-B) Linear plots of OTC in the range of 0.1-90  $\mu\text{M}$ . The error bars represent the standard deviation ( $n=3$ ).



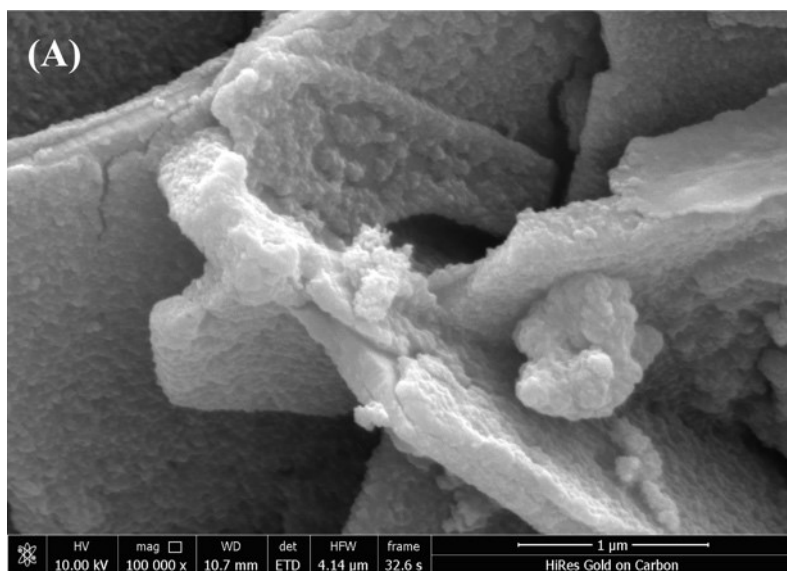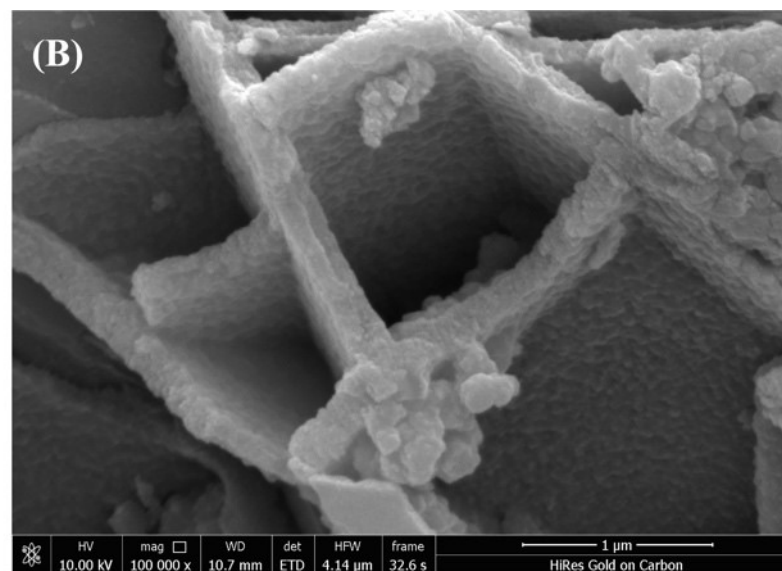

**Fig. S3.** (A) SEM image of  $\text{FeMoO}_4@\text{Fe}_7\text{S}_8$ -1 NPs; (B) SEM image of  $\text{FeMoO}_4@\text{Fe}_7\text{S}_8$ -1 NPs after 7 months of storage.

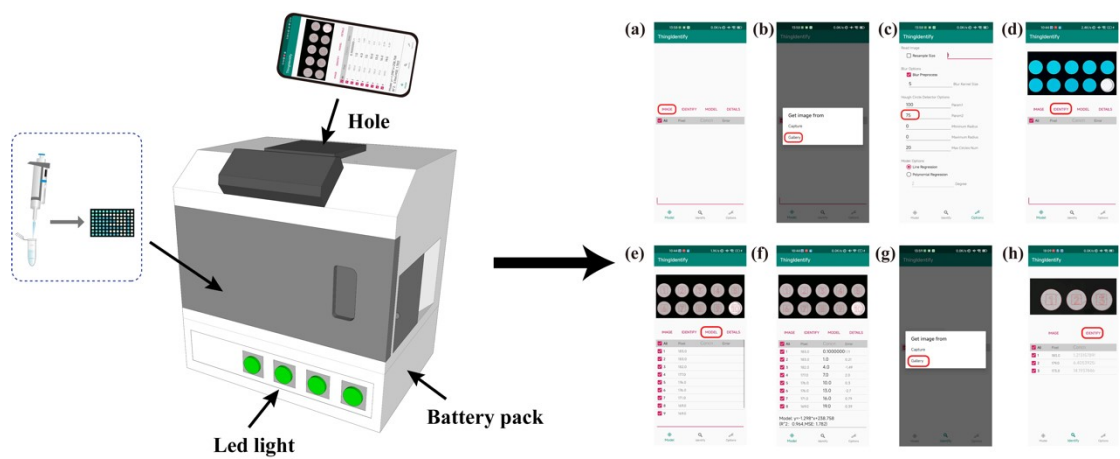

**Fig. S4.** Schematic illustration on the smartphone-based colorimetric assay platform.

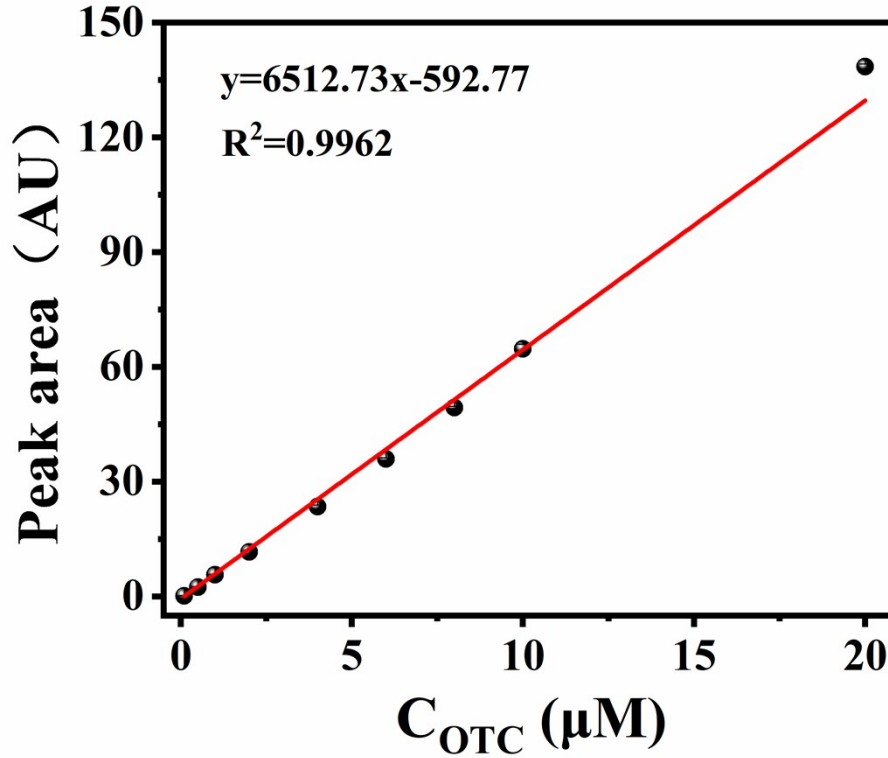

**Fig. S5.** Linear relationship between peak area and concentration of OTC (0.1-20  $\mu\text{M}$ )

**Table S1.** BET testing data.

| Samples                         | Surface area ( $\text{m}^2/\text{g}$ ) | Pore volume ( $\text{cm}^3/\text{g}$ ) | Pore size (nm) |
|---------------------------------|----------------------------------------|----------------------------------------|----------------|
| $\text{Fe}_7\text{S}_8$         | 13.46                                  | 0.058                                  | 20.36          |
| $\text{FeMoO}_4$                | 2.18                                   | 0.0094                                 | 24.78          |
| $\text{FeMoO}_4@Fe_7S_8$ -1 NPs | 6.31                                   | 0.024                                  | 18.12          |

**Table S2.** Comparison of the kinetics parameters of  $\text{FeMoO}_4@Fe_7S_8$ -1 NPs with other TMCs-based nanozymes

| Nanozymes                               | $K_m$ (mM) |                        | $V_{max}$ ( $10^{-8}$ M/s) |                        | Refs. |
|-----------------------------------------|------------|------------------------|----------------------------|------------------------|-------|
|                                         | TMB        | $\text{H}_2\text{O}_2$ | TMB                        | $\text{H}_2\text{O}_2$ |       |
| $\text{Fe}_3\text{O}_4$                 | 0.42       | 0.97                   | 5.5                        | 7.02                   | [1]   |
| His- $\text{Fe}_3\text{O}_4$            | 0.42       | 0.54                   | 6.72                       | 7.02                   |       |
| $\text{Fe}_3\text{O}_4@SiO_2@NiCo_2S_4$ | 0.26       | 0.05                   | 3.33                       | 5.12                   | [2]   |
| Fe/NC                                   | 0.13       | 7.37                   | 4.07                       | 6.41                   | [3]   |
| $\text{Fe}_7S_8$ -100                   | 0.13       | 0.29                   | 17.02                      | 14.52                  | [4]   |
| $\text{Fe}_2\text{MoO}_4$               | 3.06       | 0.26                   | 1.81                       | 8.22                   | [5]   |
| $\text{MoS}_2$                          | 5.23       | 0.48                   | 1.44                       | 0.21                   | [6]   |

---

|                                                           |      |      |      |      |            |
|-----------------------------------------------------------|------|------|------|------|------------|
| SWCNTS@MoS <sub>2</sub>                                   | 0.19 | 1.51 | 4.66 | 0.45 |            |
| FeMoO <sub>4</sub> @Fe <sub>7</sub> S <sub>8</sub> -1 NPs | 0.09 | 0.33 | 3.10 | 3.24 | This work. |

---

### Reference

- [1] X. Yuan, S. Cheng, L. Chen, Z. Cheng, J. Liu, H. Zhang, J. Yang and Y. Li, Iron oxides based nanozyme sensor arrays for the detection of active substances in licorice, *Talanta*, 2023, **258**, 124407.
- [2] X. Wang, M. Chen and L. Zhao, Development of a colorimetric sensing assay for ascorbic acid and sarcosine utilizing the dual-class enzyme activity of Fe<sub>3</sub>O<sub>4</sub>@SiO<sub>2</sub>@NiCo<sub>2</sub>S<sub>4</sub>, *Chem. Eng. J.*, 2023, **468**, 143612.
- [3] Y. Miao, M. Xia, C. Tao, J. Zhang, P. Ni, Y. Jiang and Y. Lu, Iron-doped carbon nitride with enhanced peroxidase-like activity for smartphone-based colorimetric assay of total antioxidant capacity, *Talanta*, 2024, **267**, 125141.
- [4] Y. Ding, T. Liu, Q. Wang, J. Gu, Y. Li, Z. Zhang and X. Wang, An enrichment-colorimetry integration strategy for nM-level Hg<sup>2+</sup> detection in environmental waters based on an efficient Fe<sub>7</sub>S<sub>8</sub>-100 nanozyme and smartphone-based visual assay, *Sensor Actuat B-Chem.*, 2023, **390**, 133995.
- [5] Y. Fu, Z. Zhao, Y. Shi, K. Xu, J. Zhang, H. Niu and Y. Xu, Hybridization chain reaction-mediated Fe<sub>2</sub>MoO<sub>4</sub> bimetallic nanozyme for colorimetric risk prediction of bladder cancer, *Biosens. Bioelectron.*, 2022, **210**, 114272.
- [6] L. Feng, L. Zhang, S. Chu, S. Zhang, X. Chen, Y. Gong, Z. Du, G. Mao and H. Wang, One-pot fabrication of nanozyme with 2D/1D heterostructure by in-situ growing MoS<sub>2</sub> nanosheets onto single-walled carbon nanotubes with enhanced catalysis for colorimetric detection of glutathione, *Anal. Chim. Acta*, 2022, **1221**, 340083.
